# Supplementary material for: Three DUF1996 Proteins Localize in Vacuoles and Function in Fungal Responses to Multiple Stresses and Metal Ions
Source: PubMed Central journal article supplement (PMC4738358; doi:10.1038/srep20566), 2016-02-03
Supplement: srep20566-s1.pdf [file srep20566-s1.pdf]

Scientific Reports

Supplementary Material

## **Three DUF1996 Proteins Localize in Vacuoles and Function in Fungal Responses to Multiple Stresses and Metal Ions**

Sen-Miao Tong, Ying Chen, Sheng-Hua Ying, and Ming-Guang Feng\*

Institute of Microbiology, College of Life Sciences, Zhejiang University, Hangzhou, Zhejiang, 310058, People's Republic of China (\*Corresponding to: mgfeng@zju.edu.cn)

|                    |                                                                                           |     |
|--------------------|-------------------------------------------------------------------------------------------|-----|
| Bba_EJP70292.1     | DEIVSFGQIS.PHVHVVTGGTAFQQTQSN.EQARSARATIDCKLLIKSNYQFCQLYHQHRD.GRFLVTMQNAAYYIKRA.....C     | 79  |
| Bba_EJP68966.1     | DEIVNFKDVS.AFAHSLHGSSGLSASADG.SALKAGKCSORVEQCKKAYNTEFLYFQDSDTGKFLVTVQVGMGLAYLLN...GENIK   | 84  |
| Bba_EJP64302.1     | DEIINEGQLS.THVHAIVGGTGFHMSMSN.EDARNKNTIDCKALKIKSNYQFCQLYHQHHD.GSFLIKLLCIAAAYIDRT.....C    | 79  |
| Cmi_EGX90679.1     | DEIVNANSVS.AFAHSLHGSSGLSASADG.AALKGDCISORVTCCKKAYNTEFLYFQDIDTGGKFLVTVQVGMGLAYLLY...GDNIK  | 84  |
| Cmi_EGX90023.1     | DEIISFGQLS.SHVHTIVGGTGYMSMSN.EDARNRNITIDCKALKIKSNYQFCQLYHQYND.SSLDLIKMLCIAAAYIDRS.....C   | 79  |
| Cmi_EGX93970.1     | DEIMSFGQIS.AHVHVVTGGTAFQLAQSNAQARGARATIDCKILIKSNYQFCQLYHERHD.GRFLVTMQNAAYYIKRA.....C      | 79  |
| Mro_XP_007822393.1 | DEIINEAS.PHANTIHGNGFSESATT.ADLLDGDICISORVTCCKKAYNTEFLYFQDAKTEKFLVTVQVGMGLAYLLY...GDNIT    | 84  |
| Mac_XP_007807914.1 | DEILFEGVMS.PHVHAVVGGTRFALNLTN.EQARQAKATIDCKRLIKSNYQFCQLYHQRRD.GRFLVEMQG.....              | 69  |
| Ani_XP_659411.1    | DEIVSFGLYV.SHMSFFGSDAVNNTIST.SAELREGCSTARNPICFVYVIFLTLVLDKSAPEGTHQFITPMRFS.....           | 75  |
| Ani_XP_681436.1    | DELISFGEPS.YHVHAVVSGKGFGLTADM.ATLLDGDICISGVKCKKAYNTEFLYFVDNATGDSLVDVDEVGMLVYLLY...GDNVE   | 84  |
| Afu_XP_753120.1    | DEIVAFGTYT.SHMATFFGSDAITNVLPT.SAELQRGCSGDNPNELSVYVVTLYVVDGDTFTEVAIFRFSTYYTNSYSND.....S    | 80  |
| Afu_XP_748048.1    | DEIMDEGKPS.SHVHAIHSGGFSMSASG.ADLKASSCSICAVTCKKAYNTEFLYFIHEN.GDDEIVNQVGLLAYLLY...GENVT     | 83  |
| Mor_ELQ61032.1     | DELATFGQIPGRVHTVMGNAFANLTTYEQTKSTONSQSVTRKLSNYVFCLEFFRFDN.GSFAAVKNSGSLIYLLHR.....HD       | 82  |
| Mor_ELQ58222.1     | DELISFGVA.CHLHSIFGGGFGDNATY.DDLMASDCISCAVTCCKKAYNTEFLYFQDATTGQFLVTVQVGMGLAYLLFPNPEGLI     | 87  |
|                    |                                                                                           |     |
| Bba_EJP70292.1     | DYAFGRQNCNNATAPI.....APPRLRMITGDPFLRTYDQSSLAQCMISHVCELEGPNEGE.TPHMSRLPCGRMRAETFFPSCWDGQ   | 160 |
| Bba_EJP68966.1     | AFPDFFRMIAGSNARR..AYTAGNPEQADPKSLWHSMEGPKQHILEQRALGFICINYDRQAEGTLYRHKMPDKAYLDANCKDGRLEI   | 171 |
| Bba_EJP64302.1     | DYKFGRRDCRDAFGAI.....APPKGLRILSGDILRRTYDKSDKTNRAISHVCLDPGQD...YIELPQKLCNEMRTQVYFPCWDGK    | 158 |
| Cmi_EGX90679.1     | AFPFDFRMIAGSNTRR..AYTAGNPEQADPKSLWQSMGQTKQNLLEQRALGFICINYDRQPEGLYRHYMPDKAYLDANCKDGRLEI    | 171 |
| Cmi_EGX90023.1     | DYQPGRKNCRCGARGAI.....APPKGLRMLSGDTSRRTYDKNDKSRRAISHVICIDFGKD...YVELPQKPCNEMRSQVFFPSCWDGK | 158 |
| Cmi_EGX93970.1     | DYAFGRNRCDGAFAPI.....APPRLRMISGDEPELRTYNPDSFAQCMISHVCELEGPNEGE.TPHMSRLPCGRMRAETFFPSCWDGH  | 160 |
| Mro_XP_007822393.1 | AFPPGFQMISSGDNDRR..TYTLGDARQFDPDRSQWAALGQTQEAALQRAIGFICINYAKNPEQTLYRHYLPKKAELDQNCTEGVRLEI | 171 |
| Mac_XP_007807914.1 | .....FQMVVGNASATGPEGLDPDQVQSWCEGDEAE.....EGKELAAFPTRTCTSTHLQTL                            | 69  |
| Ani_XP_659411.1    | AYYELLNEAIEIPLPEN.....FQMVVGNASATGPEGLDPDQVQSWCEGDEAE.....EGKELAAFPTRTCTSTHLQTL           | 144 |
| Ani_XP_681436.1    | AFPFDFRMIAGDPFQR....NFTWPIPPPKSEWIGD.QASQAALRQRAIGFICINYAKAEPISLGRHFLPEKAYLDEHCTDGVRFEI   | 167 |
| Afu_XP_753120.1    | AIPQDFAMISGN.....ASAHSQAEADHPYNLEWFCGESSER.....ESDIALPTSTCDQHLQNL                         | 138 |
| Afu_XP_748048.1    | AFPDNFRMIAGDTYLR....DFFWPIPPPKSEWIGK.QGSQEAALRQRAIGFICINYALDPEPSLGRHFLPNKTYLDEHCTDGVRFEL  | 166 |
| Mor_ELQ61032.1     | KKEPEYAKGLQFFPEG.....FRMIAGEPLARQRNDTQGRKQKAVSFFCLRGEF...TPATPYLPKMR....CKNGMRAQI         | 154 |
| Mor_ELQ58222.1     | AFPFGRMIAGDSLRRNYSEALGDVSKPDPKSIWAKLGQTSQPDLQRAIGFICINYAKAPEGSLSRHFLPKAYLDANCADGVRFEQ     | 176 |
|                    |                                                                                           |     |
| Bba_EJP70292.1     | NLD...SS.NHKD...HMAFPAVGAYNFVCEHSHPTAILSVFVFFFYDTGSLE.....DPNRIVWAMGPTFCYGLHGTYLQEW       | 232 |
| Bba_EJP68966.1     | MFPSCWNG.KDIDAKDHKSHMAYPDLVMTGTCHEGYETRVFSLMPEIWSVSPYKD.....RNGRFVFSNGDTEGYAYHAFMMGW      | 251 |
| Bba_EJP64302.1     | NLDSPDHK.SHASTEFRMRSFPGYDNGVCEHSHFVATVSVFNEFFWNTRQVQGG.....AFRRVYANGDTEGYGLHGTYLQEW       | 239 |
| Cmi_EGX90679.1     | MFPSCWDG.KNTDSSDHKSHMAYPDLVMTGTCHEGYETRVFSLMPEIWSVVPFKN.....RNGRFVFSNGDTEGYAYHAFMMGW      | 251 |
| Cmi_EGX90023.1     | NLDSPDHK.SHV.....AFPALGDYNTVCEHSHFVAIVSVFNEFFYNTIRQVQSK.....DFRRVYANGDTEGYGLHGTYLQEW      | 232 |
| Cmi_EGX93970.1     | NLD...SG.NHKD...HLAFAIGAINTVCEHSHFKAILSVFVFFFYDTGAIK.....NPNRIVWAMGPTFCYGLHGTYLQEW        | 232 |
| Mro_XP_007822393.1 | MFPSCWKGNAIDSEDDHKSHMAFPDQVMTGTCHEGYFVRTFSLYDPTIWNNTYAFKN.....RDGRFVSNGDTEGYGLHGTYLQEW    | 252 |
| Mac_XP_007807914.1 | .....IMAFPAVGDYNTVCEHSHFVAILSVFVFFFYNTRAVK.....DFNRVWAMGPTFCYGLHGTYLQEW                   | 132 |
| Ani_XP_659411.1    | WFPDCANP..DTFETAYSKNKFAFEGYGENWCEIGMYKIPRLRFSIRYDLRKLDPG.....WDGEPFLELPCGNSFCSHGFIINGW    | 224 |
| Ani_XP_681436.1    | MFPSCWNG.KDIDSDDHASHVAYPDLVMTGTCHEGFETRIVSLFFETIWNNTYAFKD.....RDGYFALSTGPTFCGYHAFMMGW     | 247 |
| Afu_XP_753120.1    | LFPQCENP.....DDHSEYDFADESNTCEGMLQMPQLRYRVQYDTRKSVAPDGWSG...PAPFQLSCSDTFGDCYCFHAFINGW      | 215 |
| Afu_XP_748048.1    | MFPSCWNG.KDVDSDDHSHVAYPDLVMTGTCHEGFETRIVSLFFETIWNNTYAFKD.....KEGYVYIANGPTFCGYHAFMMGW      | 246 |
| Mor_ELQ61032.1     | HFPACWNG.KDNDSPDHSHVAYPDLVMTGTCHEGFETRIVSLFFETIWNNTYAFKD.....KEGYVYIANGPTFCGYHAFMMGW      | 242 |
| Mor_ELQ58222.1     | MFPSCWNG.VDVDSPDHRSVAYPDLVMTGTCHEKSHPKRLISLFFETIWNNTAFAFG.....RNGRFVFSNGDTEGYGLHGTYLQEW   | 256 |

**Figure S1 Sequence features of domain regions in the DUF1996 family proteins of several filamentous fungi.** NCBI accession code of each protein follows the fungal name (Ani, *Aspergillus nidulans*; Afu, *Aspergillus fumigatus*; Bba, *Beauveria bassiana*; Cmi, *Cordyceps militaris*; Mac, *Metarhizium acridum*; Mro, *Metarhizium robertsii*; Mor, *Magnaporthe oryzae*). Red: 100% identity. Blue: 75% identity.

|                    |                                                                                            |     |
|--------------------|--------------------------------------------------------------------------------------------|-----|
| Bba_EJP70292.1     | CFIVSFGQISPHVHVVTIGTAFQQTQSNEQARSARATIDKLLDRSNWQQLNHRHDGRREIVTMQENAAAIKRRACDYAPGRQNC       | 88  |
| Bba_EJP68966.1     | CFIVNEKDVSAHAHSLHSSGLSASADGSALKAGKCTSRVEQKRSAYWTFSLIFQDSDTGFREIVTQVWGMLAYLLNGDNIAKAFPDD    | 89  |
| Bba_EJP64302.1     | CFIINEGQLSTFVHAIVGGTFHMSMSNEDARNRKNITDKALDRSNWQQLNHRHDGRREIVTMQENAAAIKRRACDYAPGRRDC        | 88  |
| Cmi_EGX90679.1     | CFIVNENSVAHAHSLHSSGLSASADGAALGGDCSTRVITQKRSAYWTFSLIFQDSDTGFREIVTQVWGMLAYLLYGDNIKAFPDE      | 89  |
| Cmi_EGX90023.1     | CFIISFGQLSSHVHTIIVGGTYMMSNEDARNARNITDKALDRSNWQQLNHRHDGRREIVTMQENAAAIKRRACDYAPGRKNC         | 88  |
| Cmi_EGX93970.1     | CFIIMSFGQISAHVHVVTIGTAFQLAQSNQAARGARATIDKILLNSNHWQQLNHRHDGRREIVTMQENAAAIKRRACDYAPGRRNC     | 88  |
| Mro_XP_007822393.1 | CFIINENEASPHATIHASNGFSEFSEATTADLLDGDCTSRVITQKRSAYWTFSLIFQDAKTEKREIVTQVWGMLAYLLYGDNITAFPFG  | 89  |
| Mac_XP_007807914.1 | CEILFSGVMSPHVHVAVVGTIRFALNLNEQARQAKATIDKRLDRSNWQQLNHRHDGRREIVEMQG.....                     | 69  |
| Consensus          | dpi p s h h g t c dks yw p ly q d g felv g y d                                             |     |
|                    |                                                                                            |     |
| Bba_EJP70292.1     | NNATAPIAPPRLRMIT...GIPFLRTYDQSSLAQQAISHVCLLEGFNEGETPHMSRLPCGRMRA...ETFFPSQNDGQND...SSNEK   | 168 |
| Bba_EJP68966.1     | FRMIAGSNARRAYTAGNPEQDPDKSLWHSMGEPKQHILEQRALGFNCLNYDKQAEGTLYRHKMPDKAYLDANCRDGIHIEIMFPSCWN   | 178 |
| Bba_EJP64302.1     | RDAPGAIAPPKGLRILS...GDTLRRTYDKSDKTNRAISHVCLDPGQD..YIELPQKLCNEMRT...QVFFPSQNDGKNIDSPDHKSHA  | 169 |
| Cmi_EGX90679.1     | FRMIAGSNTRRAYTAGNPEQDPDKSLWQSMGQTKNLLQRALGFNCLNYDKQPEGTLYRHYMPDKAYLDANCRDGIHIEIMFPSCWD     | 178 |
| Cmi_EGX90023.1     | RGARGAIAPPKGLRMLS...GDTSRRTYDKNDKSRQRAISHVCLDPGKD..YVELPQKPCNEMRS...QVFFPSQNDGKNIDSPDHKSHV | 169 |
| Cmi_EGX93970.1     | DGAPAPIAPPRLRMISS...GPELRTYNSDFQAQAISHVCLLEGFNEGETPHMSRLPCGRMRA...QTFPPSQNDGHNID...SGNHK   | 168 |
| Mro_XP_007822393.1 | FQMISGDNDRRTYTLGDARQHPDRSQWAALGQTTQEAQAQRAIGFNCNLVAKNPEQTLYRHYLPKRAELDQNCDEGVRIEIMFPSCWK   | 178 |
| Mac_XP_007807914.1 | .....                                                                                      | 69  |
| Consensus          | d c dg l                                                                                   |     |
|                    |                                                                                            |     |
| Bba_EJP70292.1     | D.....HMAFFAVGAYNFVCFESHETAILSVFYFFFYDGSLE..DPNLLWAMGEPVGYCLFGYILQEN                       | 232 |
| Bba_EJP68966.1     | G.XDIDAKDHKSHMAYPDLVMTGTCHEGYETRVPSLMFHTIWSVSPYKD.RNGHFVFSNGETESYFYAFQFMGN                 | 251 |
| Bba_EJP64302.1     | S.....TEFRRMSFPSIGDYNGVCFESHVVAIVSVFNFFFWNTRQVQGGAFRWVYANGETVGYCLFGYILQEN                  | 239 |
| Cmi_EGX90679.1     | G.XNIDSSDHKSHMAYPDLVMTGTCHEGYETRVPSLMFHTIWSVVPFKN.RNGHFVFSNGETESYFYAFQFMGN                 | 251 |
| Cmi_EGX90023.1     | .....AFPALGDYNTGVCETHVVAIVSVFNFFFYNTRQVQSKDFRWVYANGETVGYCLFGYILQEN                         | 232 |
| Cmi_EGX93970.1     | D.....HLAFAIGAAYNTGVCQSHKAILSVFYFFFYDGAIR..NPNLLWAMGEPVGYCLFGYILQEN                        | 232 |
| Mro_XP_007822393.1 | GGNAIDSEDHKSHMAFPDQVMTGTCHEGYFVRTPSILYTIWNTYAFKN.RDGHFVFSNGETESYFYAFQFMTEW                 | 252 |
| Mac_XP_007807914.1 | .....IMAFFAVGDYNTGVCQSHVAILSVFYFFFYNTRAVK..DFNLLWAMGEPVGYCLFGYILGN                         | 132 |
| Consensus          | tg cp p s e t r v gd tgyg hgd gw                                                           |     |

**Figure S2 Sequence features of domain regions in the DUF1996 proteins of four filamentous fungal insect pathogens.** NCBI accession code of each protein follows the fungal name (Bba, *Beauveria bassiana*; Cmi, *Cordyceps militaris*; Mac, *Metarhizium acridum*; Mro, *Metarhizium robertsii*). Red: 100% identity. Blue: 75% identity.



**Table S1.** Paired primers designed for manipulation of three VLP-coding genes (*vlp1–3*) in *B. bassiana* and identification of their deletion and complementary mutants.

| Primers    | Sequences (5'–3')*                                                                                                      | Purpose                           |
|------------|-------------------------------------------------------------------------------------------------------------------------|-----------------------------------|
| Vlp1-F/R   | AGCTTTGTTTAAACATGCCCTCAAATTGGTCACTC / AAAAAGACTAGTTACCGGGTCCCCGGTAACC                                                   | Cloning <i>vlp1</i> cDNA          |
| Vlp2-F/R   | AGCTTTGTTTAAACATGTTCAAGCTTACTACCGCCGTG / AAAAAGACTAGTGCTCCGGCGGACGTGAGC                                                 | Cloning <i>vlp2</i> cDNA          |
| Vlp3-F/R   | AGCTTTGTTTAAACATGCTTTCTAAATACCTTGTTC / AAAAAGACTAGTGAGAGCAACACAGCGTTGG                                                  | Cloning <i>vlp3</i> cDNA          |
| Vlp1up-F/R | AAACCGGAATTCTCTACCAATGAACCTTGTCTG / AAACCCAAGCTTCAAGAAGAAACGAAGAACGGAG                                                  | Cloning <i>vlp1</i> 5'(1501 bp)   |
| Vlp1dn-F/R | AACTAGTCTAGAATGCTAAGCGACGGCAGAGAAT / AAAAAAGTTAACTTGC GGCTCTGAAAGGTGAAAT                                                | Cloning <i>vlp1</i> 3'(1525 bp)   |
| Vlp2up-F/R | AAACGCGGATCCACCTACCTACCTAATCGTTGG / AAACCCAAGCTTCTTTGATGGTAAGGAGTGGAC                                                   | Cloning <i>vlp2</i> 5'(1584bp)    |
| Vlp2dn-F/R | AA CTAGTCTAGAACTCCTACCGCTTCTACCAACC / AAAGGAAGATCTCCAGCCAGCCCTTCTCTTT                                                   | Cloning <i>vlp2</i> 3'(1588 bp)   |
| Vlp3up-F/R | AAACCGGAATTCGCGAGTCTGGTCTTGAGCATT / AAACGCGGATCCAAGGTAGCAATGGGGGAGAG                                                    | Cloning <i>vlp3</i> 5'(1424 bp)   |
| Vlp3dn-F/R | AACTAGACTAGTGGCATTGAGGGAGAAGATTG / AAAAAAGTTAACGT CAGGCTCTTCTTCTGTTTC                                                   | Cloning <i>vlp3</i> 3'(1637 bp)   |
| Vlp1fl-F/R | <u>GGGGACAAGTTTGTACAAAAAGCAGGCT</u> GAGGCTCCAACCCATAGACATT/ <u>GGGGACCACTTTGTACAAGAAAGCTGGGT</u> CTTGACGGCGACCATCATTTAC | Cloning full-length <i>vlp1</i>   |
| Vlp2fl-F/R | <u>GGGGACAAGTTTGTACAAAAAGCAGGCT</u> TCCGTTGACCAAGTGCCTGAGT/ <u>GGGGACCACTTTGTACAAGAAAGCTGGGT</u> GAATGTGTTGCCTGGTGAGACG | Cloning full-length <i>vlp2</i>   |
| Vlp3fl-F/R | <u>GGGGACAAGTTTGTACAAAAAGCAGGCT</u> TAGAAAGGCAATCCCTCCAT/ <u>GGGGACCACTTTGTACAAGAAAGCTGGGT</u> TTATCCGTCACAAGTAGTCCGT   | Cloning full-length <i>vlp3</i>   |
| pVlp1- F/R | AAATCCTTGATACCGTCTCCGT / AAATCGCAGTATTCAGTGTCCG                                                                         | PCR detection of <i>vlp1</i>      |
| pVlp2- F/R | ACACCATCTCAGACTGCTCATC / CTGCTGCGTCCAGAGTATTTTG                                                                         | PCR detection of <i>vlp2</i>      |
| pVlp3- F/R | TACCTTGTTGCTCTCTCCCCCA / GCGTATCGGTTTTCCGGCTTTTG                                                                        | PCR detection of <i>vlp3</i>      |
| sbVlp1-F/R | TTGTGCGACTGAATACTGC / CATGGGATCTTCCGCTTCT                                                                               | For Southern probe of <i>vlp1</i> |
| sbVlp2-F/R | TTCTTTCATTGGCGAGGAT / TGAGTGGCTGGTGGTGG                                                                                 | For Southern probe of <i>vlp2</i> |
| sbVlp3-F/R | ACAGCCAATGCCACCTAC / TTGCCAAACCCTTCGGATA                                                                                | For Southern probe of <i>vlp3</i> |
| qVlp1-F/R  | GGCAATCCTGTCCGTGTT / CAGGTAGTCGCCGTGGAG                                                                                 | qRT-PCR detecting <i>vlp1</i>     |
| qVlp2-F/R  | CCACTCCTACCGCTTCTAC / GTGTTGCCGTTGGTGATG                                                                                | qRT-PCR detecting <i>vlp2</i>     |
| qVlp3-F/R  | GGAGGTTGGCTTGAATGG / ATGGCGTAGAATCTCTGTTG                                                                               | qRT-PCR detecting <i>vlp3</i>     |
| q18S-F/R   | TGGTTTCTAGACCGCGTAA / CCTTGGCAAATGCTTTCGC                                                                               | qRT-PCR of 18S rRNA               |

\* Underlined regions: introduced cleavage sites of restriction enzymes for the deletion of *vlp1* (*EcoRI/HindIII* and *XbaI/HpaI*), *vlp2* (*BamHI/HindIII* and *XbaI/BglII*) and *vlp3* (*EcoRI/BamHI* and *SpeI/HpaI*). Italicized and underlined regions: the gateway exchange fragments for each *vlp* complementation.
